# Supplementary material for: Basal-like phenotype is not associated with patient survival in estrogen-receptor-negative breast cancers
Source: PubMed Central journal article supplement (PMC1851391; doi:10.1186/bcr1649), 2007-01-31

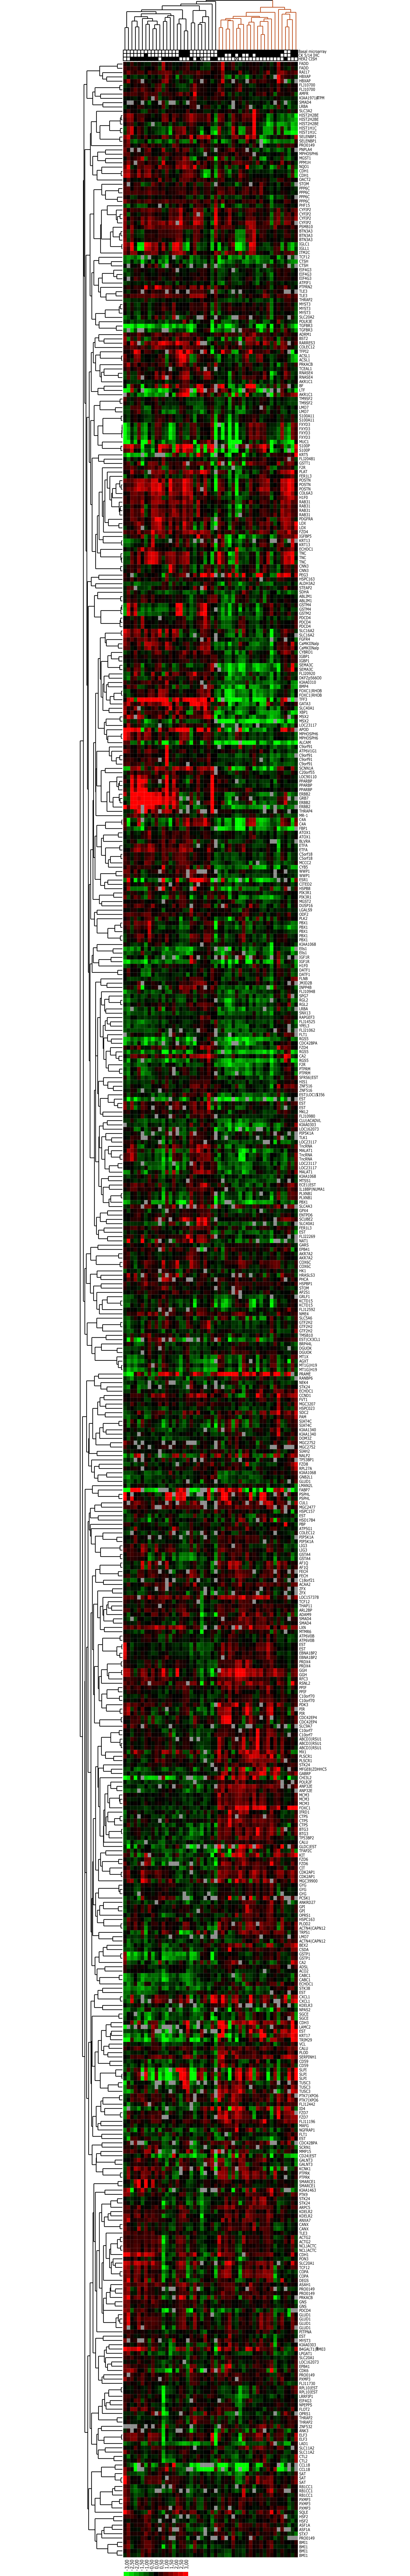

Supplement: bcr1649-S3.pdf [file bcr1649-S3.pdf]
