# Supplementary material for: Basal-like phenotype is not associated with patient survival in estrogen-receptor-negative breast cancers
Source: PubMed Central journal article supplement (PMC1851391; doi:10.1186/bcr1649), 2007-01-31
Supplement: bcr1649-S4.pdf [file bcr1649-S4.pdf]

**Up-regulated in CK5/14+**

| Gene Category                                                                                       | EASE score                                                          | Gene Rank                                                  | Gene Name                                                           | Gene Symbol                                                                                       | UniGene ID                                                       |        |                                     |
|-----------------------------------------------------------------------------------------------------|---------------------------------------------------------------------|------------------------------------------------------------|---------------------------------------------------------------------|---------------------------------------------------------------------------------------------------|------------------------------------------------------------------|--------|-------------------------------------|
| Epidermal differentiation & Ectoderm development<br>Biological Process GO:008544 & GO:007398        | 0.007                                                               | 329                                                        | Keratin 17                                                          | KRT17                                                                                             | HS.2785                                                          |        |                                     |
|                                                                                                     |                                                                     | 868                                                        | Keratin 14 (epidermolysis bullosa simplex, Dowling-Meara, Koebne)   | KRT14                                                                                             | HS.355214                                                        |        |                                     |
|                                                                                                     |                                                                     | 828                                                        | Fatty acid binding protein 5 (psoriasis-associated)                 | FABP5                                                                                             | HS.408061                                                        |        |                                     |
|                                                                                                     |                                                                     | 92                                                         | Desmoplakin                                                         | DSP                                                                                               | HS.519873                                                        |        |                                     |
|                                                                                                     |                                                                     | 664                                                        | Procollagen-llysine 1, 2-oxoglutarate 5-dioxygenase (lysine hydroxy | FLOD                                                                                              | HS.75093                                                         |        |                                     |
|                                                                                                     |                                                                     | Protein biosynthesis<br>Biological Process GO:0006412      | 0.027                                                               | 276                                                                                               | UDP-GlcNAc:betaGal beta-1,3-N-acetylglucosaminyltransferase 5    | B3GN15 | HS.257222                           |
|                                                                                                     |                                                                     |                                                            |                                                                     | 870                                                                                               | Alanyl-tRNA synthetase                                           | AARS   | HS.315137                           |
|                                                                                                     |                                                                     |                                                            |                                                                     | 778                                                                                               | Ribosomal protein S5                                             | RPS5   | HS.378103                           |
|                                                                                                     |                                                                     |                                                            |                                                                     | 865                                                                                               | Eukaryotic translation initiation factor (eIF) 2A                | eIF2A  | HS.378808                           |
|                                                                                                     |                                                                     |                                                            |                                                                     | 333                                                                                               | Mitochondrial ribosomal protein S10                              | MRPS10 | HS.380887                           |
| 442                                                                                                 | Eukaryotic translation initiation factor 3, subunit 6 48kDa         |                                                            |                                                                     | EIF3S6                                                                                            | HS.405590                                                        |        |                                     |
| 934                                                                                                 | Ribosomal protein S10                                               |                                                            |                                                                     | RPS10                                                                                             | HS.406620                                                        |        |                                     |
| 615                                                                                                 | Prostaglandin F2 receptor negative regulator                        |                                                            |                                                                     | PTGFRN                                                                                            | HS.418093                                                        |        |                                     |
| 433                                                                                                 | KIAA0056 protein                                                    |                                                            |                                                                     | KIAA0056                                                                                          | HS.438550                                                        |        |                                     |
| 630                                                                                                 | Chromosome 1 open reading frame 33                                  |                                                            |                                                                     | C1orf33                                                                                           | HS.463797                                                        |        |                                     |
| 131                                                                                                 | ElaC homolog 1 (E. coli)                                            |                                                            |                                                                     | ELAC1                                                                                             | HS.47572                                                         |        |                                     |
| 408                                                                                                 | Mitochondrial ribosomal protein L2                                  |                                                            |                                                                     | MRPL2                                                                                             | HS.55041                                                         |        |                                     |
| 522                                                                                                 | Eukaryotic translation elongation factor 1 epsilon 1                |                                                            |                                                                     | EEF1E1                                                                                            | HS.88977                                                         |        |                                     |
| 470                                                                                                 | Ribonuclease P/MRP 38kDa subunit                                    |                                                            |                                                                     | RPP38                                                                                             | HS.94986                                                         |        |                                     |
| Nuclear division<br>Biological Process GO:000280                                                    | 0.031                                                               |                                                            |                                                                     | 930                                                                                               | Cell division cycle 25A                                          | CDC25A | HS.1634                             |
|                                                                                                     |                                                                     | 791                                                        | Cyclin B2                                                           | CCNB2                                                                                             | HS.194698                                                        |        |                                     |
|                                                                                                     |                                                                     | 633                                                        | Cyclin B1                                                           | CCNB1                                                                                             | HS.23960                                                         |        |                                     |
|                                                                                                     |                                                                     | 646                                                        | CHK1 checkpoint homolog (S. pombe)                                  | CHK1                                                                                              | HS.24529                                                         |        |                                     |
|                                                                                                     |                                                                     | 939                                                        | SKB1 homolog (S. pombe)                                             | SKB1                                                                                              | HS.367654                                                        |        |                                     |
|                                                                                                     |                                                                     | 577                                                        | RAD51 homolog (RecA homolog, E. coli) (S. cerevisiae)               | RAD51                                                                                             | HS.446554                                                        |        |                                     |
|                                                                                                     |                                                                     | 285                                                        | Kinesin family member 2C                                            | KIF2C                                                                                             | HS.69360                                                         |        |                                     |
|                                                                                                     |                                                                     | 158                                                        | Cyclin A2                                                           | CCNA2                                                                                             | HS.85137                                                         |        |                                     |
|                                                                                                     |                                                                     | Development<br>Biological Process GO:007275                | 0.033                                                               | 5                                                                                                 | Jerky homolog-like (mouse)                                       | JRKL   | HS.105940                           |
|                                                                                                     |                                                                     |                                                            |                                                                     | 11                                                                                                | Epithelial V-like antigen 1                                      | EVA1   | HS.116651                           |
| 504                                                                                                 | zinc finger protein 74 (Cos52)                                      |                                                            |                                                                     | ZNF74                                                                                             | HS.127476                                                        |        |                                     |
| 94                                                                                                  | Neighbor of COX4                                                    |                                                            |                                                                     | NOO4                                                                                              | HS.173162                                                        |        |                                     |
| 197                                                                                                 | PAP associated domain containing 1                                  |                                                            |                                                                     | PAPD1                                                                                             | HS.173946                                                        |        |                                     |
| 710                                                                                                 | Dynamitin 1-like                                                    |                                                            |                                                                     | DNM1L                                                                                             | HS.180628                                                        |        |                                     |
| 824                                                                                                 | High-mobility group box 3                                           |                                                            |                                                                     | HMG3                                                                                              | HS.19114                                                         |        |                                     |
| 574                                                                                                 | Bridging integrator 1                                               |                                                            |                                                                     | BIN1                                                                                              | HS.313363                                                        |        |                                     |
| 755                                                                                                 | SRY (sex determining region Y)-box 9 (campomelic dysplasia, auto    |                                                            |                                                                     | SOX9                                                                                              | HS.2316                                                          |        |                                     |
| 646                                                                                                 | CHK1 checkpoint homolog (S. pombe)                                  |                                                            |                                                                     | CHK1                                                                                              | HS.24529                                                         |        |                                     |
| 276                                                                                                 | UDP-GlcNAc:betaGal beta-1,3-N-acetylglucosaminyltransferase 5       |                                                            |                                                                     | B3GN15                                                                                            | HS.257222                                                        |        |                                     |
| 165                                                                                                 | UDP glycosyltransferase 8 (UDP-galactose ceramide galactosyltran    |                                                            |                                                                     | UGT8                                                                                              | HS.274293                                                        |        |                                     |
| 329                                                                                                 | Keratin 17                                                          |                                                            |                                                                     | KRT17                                                                                             | HS.2785                                                          |        |                                     |
| 390                                                                                                 | Alpha-2-HS-glycoprotein                                             |                                                            |                                                                     | AHSG                                                                                              | HS.324746                                                        |        |                                     |
| 305                                                                                                 | Forkhead box C1                                                     |                                                            |                                                                     | FOXC1                                                                                             | HS.349883                                                        |        |                                     |
| 868                                                                                                 | Keratin 14 (epidermolysis bullosa simplex, Dowling-Meara, Koebne    |                                                            |                                                                     | KRT14                                                                                             | HS.355214                                                        |        |                                     |
| 828                                                                                                 | Fatty acid binding protein 5 (psoriasis-associated)                 |                                                            |                                                                     | FABP5                                                                                             | HS.408061                                                        |        |                                     |
| 26                                                                                                  | Crystallin, alpha B                                                 |                                                            |                                                                     | CRYAB                                                                                             | HS.408767                                                        |        |                                     |
| 835                                                                                                 | kinesin family member 1B                                            |                                                            |                                                                     | KIF1B                                                                                             | HS.444757                                                        |        |                                     |
| 550                                                                                                 | Glutaraldolase 2                                                    |                                                            |                                                                     | GLRX2                                                                                             | HS.458283                                                        |        |                                     |
| 92                                                                                                  | Desmoplakin                                                         |                                                            |                                                                     | DSP                                                                                               | HS.519873                                                        |        |                                     |
| 513                                                                                                 | Chaperonin containing TCP1, subunit 6B (zeta 2)                     |                                                            |                                                                     | CCT6B                                                                                             | HS.73072                                                         |        |                                     |
| 637                                                                                                 | T-cell acute lymphocytic leukemia 1                                 |                                                            |                                                                     | TAL1                                                                                              | HS.73828                                                         |        |                                     |
| 654                                                                                                 | Procollagen-llysine 1, 2-oxoglutarate 5-dioxygenase (lysine hydroxy |                                                            |                                                                     | FLOD                                                                                              | HS.75093                                                         |        |                                     |
| 465                                                                                                 | Carboxypeptidase Z                                                  |                                                            |                                                                     | CPZ                                                                                               | HS.78068                                                         |        |                                     |
| 33                                                                                                  | Kallikrein 6 (neurosin, zyme)                                       |                                                            |                                                                     | KLK6                                                                                              | HS.79361                                                         |        |                                     |
| 50                                                                                                  | Chromosome 4 open reading frame 14                                  |                                                            |                                                                     | C4orf14                                                                                           | HS.8715                                                          |        |                                     |
| Biosynthesis<br>Biological Process GO:000958                                                        | 0.035                                                               |                                                            |                                                                     | 748                                                                                               | Hypothetical protein CL640                                       | CL640  | HS.144304                           |
|                                                                                                     |                                                                     |                                                            |                                                                     | 3                                                                                                 | Adenosylmethionine decarboxylase 1                               | AMD1   | HS.159118                           |
|                                                                                                     |                                                                     |                                                            |                                                                     | 276                                                                                               | UDP-GlcNAc:betaGal beta-1,3-N-acetylglucosaminyltransferase 5    | B3GN15 | HS.257222                           |
|                                                                                                     |                                                                     |                                                            |                                                                     | 165                                                                                               | UDP glycosyltransferase 8 (UDP-galactose ceramide galactosyltran | UGT8   | HS.274293                           |
|                                                                                                     |                                                                     |                                                            |                                                                     | 204                                                                                               | Cytidine monophosphate N-acetylneuraminic acid synthetase        | CNAS   | HS.311346                           |
|                                                                                                     |                                                                     |                                                            |                                                                     | 870                                                                                               | Alanyl-tRNA synthetase                                           | AARS   | HS.315137                           |
|                                                                                                     |                                                                     |                                                            |                                                                     | 778                                                                                               | Ribosomal protein S5                                             | RPS5   | HS.378103                           |
|                                                                                                     |                                                                     |                                                            |                                                                     | 865                                                                                               | Eukaryotic translation initiation factor (eIF) 2A                | eIF2A  | HS.378808                           |
|                                                                                                     |                                                                     | 281                                                        | stearoyl-CoA desaturase 4                                           | SCD4                                                                                              | HS.379191                                                        |        |                                     |
|                                                                                                     |                                                                     | 333                                                        | Mitochondrial ribosomal protein S10                                 | MRPS10                                                                                            | HS.380887                                                        |        |                                     |
|                                                                                                     |                                                                     | 442                                                        | Eukaryotic translation initiation factor 3, subunit 6 48kDa         | EIF3S6                                                                                            | HS.405590                                                        |        |                                     |
|                                                                                                     |                                                                     | 934                                                        | Ribosomal protein S10                                               | RPS10                                                                                             | HS.406620                                                        |        |                                     |
|                                                                                                     |                                                                     | 615                                                        | Prostaglandin F2 receptor negative regulator                        | PTGFRN                                                                                            | HS.418093                                                        |        |                                     |
|                                                                                                     |                                                                     | 887                                                        | Methylenetetrahydrofolate dehydrogenase (NADP+ dependent) 1, n      | MTHFD1                                                                                            | HS.435974                                                        |        |                                     |
|                                                                                                     |                                                                     | 433                                                        | KIAA0056 protein                                                    | KIAA0056                                                                                          | HS.438550                                                        |        |                                     |
|                                                                                                     |                                                                     | 417                                                        | Uridine-cytidine kinase 2                                           | UCK2                                                                                              | HS.458380                                                        |        |                                     |
|                                                                                                     |                                                                     | 630                                                        | Chromosome 1 open reading frame 33                                  | C1orf33                                                                                           | HS.463797                                                        |        |                                     |
|                                                                                                     |                                                                     | 131                                                        | ElaC homolog 1 (E. coli)                                            | ELAC1                                                                                             | HS.47572                                                         |        |                                     |
|                                                                                                     |                                                                     | 408                                                        | Mitochondrial ribosomal protein L2                                  | MRPL2                                                                                             | HS.55041                                                         |        |                                     |
|                                                                                                     |                                                                     | 394                                                        | Adenylosuccinate lyase                                              | ADSL                                                                                              | HS.75527                                                         |        |                                     |
| 522                                                                                                 | Eukaryotic translation elongation factor 1 epsilon 1                | EEF1E1                                                     | HS.88977                                                            |                                                                                                   |                                                                  |        |                                     |
| 470                                                                                                 | Ribonuclease P/MRP 38kDa subunit                                    | RPP38                                                      | HS.94986                                                            |                                                                                                   |                                                                  |        |                                     |
| Histogenesis<br>Biological Process GO:0009888                                                       | 0.037                                                               | 461                                                        | CD59 antigen p18-20 (antigen identified by monoclonal antibodies    | CD59                                                                                              | HS.2785                                                          |        |                                     |
|                                                                                                     |                                                                     | 868                                                        | Keratin 14 (epidermolysis bullosa simplex, Dowling-Meara, Koebne    | KRT14                                                                                             | HS.355214                                                        |        |                                     |
|                                                                                                     |                                                                     | 828                                                        | Fatty acid binding protein 5 (psoriasis-associated)                 | FABP5                                                                                             | HS.408061                                                        |        |                                     |
|                                                                                                     |                                                                     | 92                                                         | Desmoplakin                                                         | DSP                                                                                               | HS.519873                                                        |        |                                     |
|                                                                                                     |                                                                     | 664                                                        | Procollagen-llysine 1, 2-oxoglutarate 5-dioxygenase (lysine hydroxy | FLOD                                                                                              | HS.75093                                                         |        |                                     |
|                                                                                                     |                                                                     | Macromolecule biosynthesis<br>Biological Process GO:000959 | 0.041                                                               | 276                                                                                               | UDP-GlcNAc:betaGal beta-1,3-N-acetylglucosaminyltransferase 5    | B3GN15 | HS.257222                           |
| 165                                                                                                 | UDP glycosyltransferase 8 (UDP-galactose ceramide galactosyltran    |                                                            |                                                                     | UGT8                                                                                              | HS.274293                                                        |        |                                     |
| 204                                                                                                 | Cytidine monophosphate N-acetylneuraminic acid synthetase           |                                                            |                                                                     | CNAS                                                                                              | HS.311346                                                        |        |                                     |
| 870                                                                                                 | Alanyl-tRNA synthetase                                              |                                                            |                                                                     | AARS                                                                                              | HS.315137                                                        |        |                                     |
| 778                                                                                                 | Ribosomal protein S5                                                |                                                            |                                                                     | RPS5                                                                                              | HS.378103                                                        |        |                                     |
| 865                                                                                                 | Eukaryotic translation initiation factor (eIF) 2A                   |                                                            |                                                                     | eIF2A                                                                                             | HS.378808                                                        |        |                                     |
| 281                                                                                                 | stearoyl-CoA desaturase 4                                           |                                                            |                                                                     | SCD4                                                                                              | HS.379191                                                        |        |                                     |
| 333                                                                                                 | Mitochondrial ribosomal protein S10                                 |                                                            |                                                                     | MRPS10                                                                                            | HS.380887                                                        |        |                                     |
| 442                                                                                                 | Eukaryotic translation initiation factor 3, subunit 6 48kDa         |                                                            |                                                                     | EIF3S6                                                                                            | HS.405590                                                        |        |                                     |
| 934                                                                                                 | Ribosomal protein S10                                               |                                                            |                                                                     | RPS10                                                                                             | HS.406620                                                        |        |                                     |
| 615                                                                                                 | Prostaglandin F2 receptor negative regulator                        |                                                            |                                                                     | PTGFRN                                                                                            | HS.418093                                                        |        |                                     |
| 887                                                                                                 | Methylenetetrahydrofolate dehydrogenase (NADP+ dependent) 1, n      |                                                            |                                                                     | MTHFD1                                                                                            | HS.435974                                                        |        |                                     |
| 433                                                                                                 | KIAA0056 protein                                                    |                                                            |                                                                     | KIAA0056                                                                                          | HS.438550                                                        |        |                                     |
| 630                                                                                                 | Chromosome 1 open reading frame 33                                  |                                                            |                                                                     | C1orf33                                                                                           | HS.463797                                                        |        |                                     |
| 131                                                                                                 | ElaC homolog 1 (E. coli)                                            |                                                            |                                                                     | ELAC1                                                                                             | HS.47572                                                         |        |                                     |
| 408                                                                                                 | Mitochondrial ribosomal protein L2                                  | MRPL2                                                      | HS.55041                                                            |                                                                                                   |                                                                  |        |                                     |
| 394                                                                                                 | Adenylosuccinate lyase                                              | ADSL                                                       | HS.75527                                                            |                                                                                                   |                                                                  |        |                                     |
| 522                                                                                                 | Eukaryotic translation elongation factor 1 epsilon 1                | EEF1E1                                                     | HS.88977                                                            |                                                                                                   |                                                                  |        |                                     |
| 470                                                                                                 | Ribonuclease P/MRP 38kDa subunit                                    | RPP38                                                      | HS.94986                                                            |                                                                                                   |                                                                  |        |                                     |
| M phase<br>Biological Process GO:000279                                                             | 0.044                                                               | 470                                                        | Ribonuclease P/MRP 38kDa subunit                                    | RPP38                                                                                             | HS.1634                                                          |        |                                     |
|                                                                                                     |                                                                     | 791                                                        | Cyclin B2                                                           | CCNB2                                                                                             | HS.194698                                                        |        |                                     |
|                                                                                                     |                                                                     | 633                                                        | Cyclin B1                                                           | CCNB1                                                                                             | HS.23960                                                         |        |                                     |
|                                                                                                     |                                                                     | 646                                                        | CHK1 checkpoint homolog (S. pombe)                                  | CHK1                                                                                              | HS.24529                                                         |        |                                     |
|                                                                                                     |                                                                     | 939                                                        | SKB1 homolog (S. pombe)                                             | SKB1                                                                                              | HS.367654                                                        |        |                                     |
|                                                                                                     |                                                                     | 577                                                        | RAD51 homolog (RecA homolog, E. coli) (S. cerevisiae)               | RAD51                                                                                             | HS.446554                                                        |        |                                     |
|                                                                                                     |                                                                     | 285                                                        | Kinesin family member 2C                                            | KIF2C                                                                                             | HS.69360                                                         |        |                                     |
|                                                                                                     |                                                                     | 158                                                        | Cyclin A2                                                           | CCNA2                                                                                             | HS.85137                                                         |        |                                     |
|                                                                                                     |                                                                     | Down-regulated in CK5/14+                                  | <0.001                                                              | 452                                                                                               | Rat guanine nucleotide dissociation stimulator                   | RALGDS | HS.106185                           |
|                                                                                                     |                                                                     |                                                            |                                                                     | 463                                                                                               | Transforming growth factor, beta 1 (Camurati-Engelmann disease)  | TGFB1  | HS.1103                             |
| 845                                                                                                 | Calcium and integrin binding 1 (calmyrin)                           |                                                            |                                                                     | CIB1                                                                                              | HS.135471                                                        |        |                                     |
| 443                                                                                                 | Fibroblast growth factor receptor 4                                 |                                                            |                                                                     | FGFR4                                                                                             | HS.165950                                                        |        |                                     |
| 512                                                                                                 | Interferon-stimulated transcription factor 3, gamma 48kDa           |                                                            |                                                                     | ISGF3G                                                                                            | HS.1706                                                          |        |                                     |
| 512                                                                                                 | Integrin, alpha L                                                   |                                                            |                                                                     | ITGAL                                                                                             | HS.174103                                                        |        |                                     |
| 428                                                                                                 | Adenosine A2a receptor                                              |                                                            |                                                                     | ADORA2A                                                                                           | HS.197029                                                        |        |                                     |
| 438                                                                                                 | Regulator of G-protein signalling 5                                 |                                                            |                                                                     | RGS5                                                                                              | HS.24950                                                         |        |                                     |
| 801                                                                                                 | Transducin-like enhancer of split 3 (E(spl) homolog, Drosophila)    |                                                            |                                                                     | TLE3                                                                                              | HS.287362                                                        |        |                                     |
| 396                                                                                                 | Regulator of G-protein signalling 16                                |                                                            |                                                                     | RGS16                                                                                             | HS.413297                                                        |        |                                     |
| 568                                                                                                 | Sprouty homolog 1, antagonist of FGF signaling (Drosophila)         |                                                            |                                                                     | SPRY1                                                                                             | HS.436944                                                        |        |                                     |
| 55                                                                                                  | V-erb-b2 erythroblastic leukemia viral oncogene homolog 2           |                                                            |                                                                     | ERBB2                                                                                             | HS.446352                                                        |        |                                     |
| 189                                                                                                 | Regulator of G-protein signalling 11                                |                                                            |                                                                     | RGS11                                                                                             | HS.65756                                                         |        |                                     |
| 15                                                                                                  | Bone morphogenetic protein 4                                        |                                                            |                                                                     | BMP4                                                                                              | HS.68879                                                         |        |                                     |
| 923                                                                                                 | GRB2-associated binding protein 1                                   |                                                            |                                                                     | GAB1                                                                                              | HS.80720                                                         |        |                                     |
| 679                                                                                                 | MAP-kinase activating death domain                                  |                                                            |                                                                     | MADD                                                                                              | HS.82548                                                         |        |                                     |
| 309                                                                                                 | Growth factor receptor-bound protein 7                              |                                                            |                                                                     | GRB7                                                                                              | HS.86859                                                         |        |                                     |
| Enzyme linked receptor protein signaling pathway<br>Biological Process GO:0007167                   | 0.002                                                               |                                                            |                                                                     | 463                                                                                               | Transforming growth factor, beta 1 (Camurati-Engelmann disease)  | TGFB1  | HS.1103                             |
|                                                                                                     |                                                                     |                                                            |                                                                     | 443                                                                                               | Fibroblast growth factor receptor 4                              | FGFR4  | HS.165950                           |
|                                                                                                     |                                                                     |                                                            |                                                                     | 568                                                                                               | Sprouty homolog 1, antagonist of FGF signaling (Drosophila)      | SPRY1  | HS.436944                           |
|                                                                                                     |                                                                     |                                                            |                                                                     | 55                                                                                                | V-erb-b2 erythroblastic leukemia viral oncogene homolog 2        | ERBB2  | HS.446352                           |
|                                                                                                     |                                                                     |                                                            |                                                                     | 15                                                                                                | Bone morphogenetic protein 4                                     | BMP4   | HS.68879                            |
|                                                                                                     |                                                                     |                                                            |                                                                     | 923                                                                                               | GRB2-associated binding protein 1                                | GAB1   | HS.80720                            |
|                                                                                                     |                                                                     |                                                            |                                                                     | 309                                                                                               | Growth factor receptor-bound protein 7                           | GRB7   | HS.86859                            |
|                                                                                                     |                                                                     |                                                            |                                                                     | Transmembrane receptor protein tyrosine kinase signaling pathway<br>Biological Process GO:0007169 | 0.018                                                            | 443    | Fibroblast growth factor receptor 4 |
|                                                                                                     |                                                                     | 568                                                        | Sprouty homolog 1, antagonist of FGF signaling (Drosophila)         |                                                                                                   |                                                                  | SPRY1  | HS.436944                           |
|                                                                                                     |                                                                     | 55                                                         | V-erb-b2 erythroblastic leukemia viral oncogene homolog 2           |                                                                                                   |                                                                  | ERBB2  | HS.446352                           |
| 623                                                                                                 | GRB2-associated binding protein 1                                   | GAB1                                                       | HS.80720                                                            |                                                                                                   |                                                                  |        |                                     |
| 309                                                                                                 | Growth factor receptor-bound protein 7                              | GRB7                                                       | HS.86859                                                            |                                                                                                   |                                                                  |        |                                     |
| Regulation of G-protein coupled receptor protein signaling pathway<br>Biological Process GO:0008277 | 0.029                                                               | 438                                                        | Regulator of G-protein signalling 5                                 | RGS5                                                                                              | HS.24950                                                         |        |                                     |
|                                                                                                     |                                                                     | 396                                                        | Regulator of G-protein signalling 16                                | RGS16                                                                                             | HS.413297                                                        |        |                                     |
|                                                                                                     |                                                                     | 189                                                        | Regulator of G-protein signalling 11                                | RGS11                                                                                             | HS.65756                                                         |        |                                     |
